# Supplementary material for: Pesticide reduces bumblebee colony initiation and increases probability of population extinction
Source: Springer Nature journal article supplement (doi:10.1038/s41559-017-0260-1), 2017-08-09
Supplement: MOESM3 [file 41559_2017_260_MOESM3_ESM.xlsx]

## Sheet: Sheet1
Survival	SURVIVED
Row Labels	Count of Eggs laid
NOPEST	98
PEST	99
Grand Total	197

## Sheet: Queen2
Supplementary Data for Baron, G. L., Jansen, V. A. A., Brown, M. J. F., and Raine N. E. 2017. Pesticide reduces bumblebee colony initiation and increases probability of population extinction, Nature Ecology and Evolution: in press.
ID	Queen colony	Male colony	Hibernation	Pesticide	Parasite	Infection status	Thorax width (mm)	Percentage weight lost during hibernation	Survival	Survival time (days)	Eggs laid	Time to egg laying (days)	Average daily syrup consumption (ml)	Adult workers reared	Number adult workers	Time to adult workers (days)
1	9	5	Short	PEST	PARA	Infected	7.55	16.61	SURVIVED	71	NO	NA	0.142573	NO	NA	NA
5	9	5	Long	PEST	PARA	Uninfected	7.79	24.53	SURVIVED	71	NO	NA	0.315917	NO	NA	NA
6	3	5	Short	PEST	PARA	Infected	7.89	15.12	SURVIVED	71	NO	NA	0.385254	NO	NA	NA
7	3	5	Short	PEST	NOPARA	Uninfected	7.78	11.54	SURVIVED	71	NO	NA	0.766611	NO	NA	NA
8	4	4	Short	PEST	NOPARA	Uninfected	8.18	7.79	SURVIVED	71	NO	NA	0.315917	NO	NA	NA
9	4	4	Short	PEST	PARA	Infected	8.1	6.17	SURVIVED	71	NO	NA	0.315917	NO	NA	NA
10	4	4	Short	NOPEST	NOPARA	Uninfected	8.14	6.67	SURVIVED	71	NO	NA	0.0349237	NO	NA	NA
11	12	8	Short	PEST	PARA	Infected	7.33	17.23	SURVIVED	71	NO	NA	0.315917	NO	NA	NA
12	9	2	Long	PEST	NOPARA	Uninfected	7.42	9.34	SURVIVED	71	NO	NA	0.523929	NO	NA	NA
13	12	2	Short	PEST	NOPARA	Uninfected	7.47	8	DIED	5	NO	NA	1.34839	NO	NA	NA
14	9	4	Long	NOPEST	PARA	Infected	7.24	16.15	SURVIVED	71	NO	NA	0.264073	NO	NA	NA
16	3	4	Short	NOPEST	NOPARA	Uninfected	7.85	20.28	SURVIVED	71	NO	NA	0.845218	NO	NA	NA
17	3	9	Long	PEST	PARA	Infected	8.15	27.81	SURVIVED	71	NO	NA	0.697273	NO	NA	NA
19	12	5	Short	NOPEST	PARA	Infected	7.78	18.8	SURVIVED	71	YES	52	0.774757	YES	10	76
22	9	4	Long	NOPEST	NOPARA	Uninfected	7.77	12.71	SURVIVED	71	NO	NA	0.845218	NO	NA	NA
23	9	4	Short	NOPEST	PARA	Infected	7.78	12.02	SURVIVED	71	NO	NA	0.0174618	NO	NA	NA
24	9	4	Short	PEST	NOPARA	Uninfected	7.21	8.55	SURVIVED	71	NO	NA	0.0539519	NO	NA	NA
25	4	9	Long	PEST	NOPARA	Uninfected	8.5	12.08	DIED	70	NO	NA	0.0385663	NO	NA	NA
26	4	9	Long	PEST	PARA	Uninfected	8.17	15	SURVIVED	71	NO	NA	0.142573	NO	NA	NA
27	9	4	Long	NOPEST	PARA	Uninfected	7.51	14.41	SURVIVED	71	YES	56	0.880448	NO	NA	NA
28	9	4	Short	NOPEST	NOPARA	Uninfected	7.04	11.6	SURVIVED	71	NO	NA	0.105384	NO	NA	NA
29	1	9	Short	PEST	PARA	Infected	7.58	24.47	SURVIVED	71	NO	NA	0.350585	NO	NA	NA
30	1	4	Short	PEST	NOPARA	Uninfected	7.88	12.5	SURVIVED	71	NO	NA	0.142573	NO	NA	NA
31	1	4	Short	NOPEST	PARA	Infected	7.42	9.25	SURVIVED	71	YES	63	0.351995	NO	NA	NA
32	1	4	Short	NOPEST	NOPARA	Uninfected	7.68	13.72	SURVIVED	71	NO	NA	1.19752	NO	NA	NA
33	1	4	Long	PEST	PARA	Infected	7.61	23.56	SURVIVED	71	YES	33	0.766611	YES	2	62
34	11	5	Short	PEST	PARA	Uninfected	7.85	21.17	SURVIVED	71	YES	9	1.32131	YES	7	38
36	1	2	Long	PEST	NOPARA	Uninfected	7.94	9.27	SURVIVED	71	YES	70	0.766611	NO	NA	NA
37	1	5	Long	NOPEST	PARA	Infected	7.74	11.14	SURVIVED	71	YES	31	0.633837	YES	9	47
39	1	5	Short	PEST	PARA	Infected	7.08	12.02	SURVIVED	71	YES	17	0.939955	YES	4	47
41	1	5	Short	NOPEST	PARA	Infected	7.51	9.57	SURVIVED	71	NO	NA	0.123152	NO	NA	NA
42	1	5	Short	NOPEST	NOPARA	Uninfected	7.74	10.79	SURVIVED	71	YES	44	0.669067	NO	NA	NA
43	15	2	Short	PEST	PARA	Infected	8.04	11.5	SURVIVED	71	YES	52	1.00929	NO	NA	NA
44	1	5	Long	PEST	PARA	Infected	8.08	13.35	SURVIVED	71	NO	NA	0.385254	NO	NA	NA
45	15	2	Short	PEST	NOPARA	Uninfected	7.78	9.68	SURVIVED	71	YES	21	0.905286	YES	3	84
46	15	2	Short	NOPEST	PARA	Infected	7.36	12.2	SURVIVED	71	YES	48	0.669067	YES	3	85
47	15	2	Short	NOPEST	NOPARA	Uninfected	7.67	13.43	SURVIVED	71	NO	NA	0.669067	NO	NA	NA
57	11	1	Short	PEST	NOPARA	Uninfected	7.9	10.14	SURVIVED	71	NO	NA	0.281248	NO	NA	NA
58	11	1	Short	NOPEST	PARA	Infected	7.7	5.69	SURVIVED	71	YES	29	1.02137	NO	NA	NA
60	11	1	Long	PEST	PARA	Infected	8.06	13.02	SURVIVED	71	YES	11	1.04396	NO	NA	NA
63	4	5	Long	PEST	NOPARA	Uninfected	8.09	18.63	SURVIVED	71	YES	70	0.939955	NO	NA	NA
64	4	5	Short	NOPEST	PARA	Infected	7.92	7.59	SURVIVED	71	YES	16	0.598607	NO	NA	NA
65	4	5	Short	PEST	NOPARA	Uninfected	8.02	8.29	SURVIVED	71	YES	24	0.80128	YES	3	65
66	4	5	Short	PEST	PARA	Infected	7.96	6.06	SURVIVED	71	NO	NA	0.142573	NO	NA	NA
67	4	5	Short	NOPEST	NOPARA	Uninfected	7.89	NA	SURVIVED	71	YES	69	0.633837	NO	NA	NA
68	4	5	Long	NOPEST	PARA	Infected	7.78	17.01	SURVIVED	71	YES	63	0.809988	NO	NA	NA
70	4	5	Long	PEST	PARA	Infected	8.47	14.4	SURVIVED	71	NO	NA	0.142573	NO	NA	NA
71	4	5	Long	NOPEST	NOPARA	Uninfected	8.09	18.58	SURVIVED	71	YES	54	0.880448	NO	NA	NA
72	4	5	Short	NOPEST	PARA	Infected	8.21	2.73	SURVIVED	71	NO	NA	0.175844	NO	NA	NA
73	3	1	Long	NOPEST	PARA	Infected	7.81	11.81	SURVIVED	71	YES	53	0.915678	YES	8	83
75	3	1	Short	NOPEST	PARA	Infected	8.24	12.09	DIED	32	NO	NA	0.528146	NO	NA	NA
76	3	1	Short	PEST	NOPARA	Uninfected	8.05	11.7	SURVIVED	71	NO	NA	0.281248	NO	NA	NA
77	3	1	Short	PEST	PARA	Infected	8.23	11.04	SURVIVED	71	NO	NA	0.939955	NO	NA	NA
78	15	1	Long	PEST	PARA	Infected	7.8	27.02	SURVIVED	71	NO	NA	0.766611	NO	NA	NA
79	3	1	Short	NOPEST	NOPARA	Uninfected	7.99	13.6	SURVIVED	71	NO	NA	0.105384	NO	NA	NA
80	3	1	Long	PEST	PARA	Infected	7.98	13.6	SURVIVED	71	NO	NA	0.21191	NO	NA	NA
83	3	1	Long	NOPEST	PARA	Infected	7.45	22.33	DIED	60	NO	NA	0.880448	NO	NA	NA
84	11	4	Long	PEST	NOPARA	Uninfected	8.18	11.16	SURVIVED	71	YES	49	1.28664	YES	6	83
87	9	1	Long	PEST	PARA	Uninfected	7.59	8.62	SURVIVED	71	NO	NA	0.385254	NO	NA	NA
91	12	1	Short	PEST	NOPARA	Uninfected	7.52	11.59	DIED	59	YES	51	0.939955	NO	NA	NA
92	15	4	Long	NOPEST	PARA	Infected	7.95	18.12	SURVIVED	71	NO	NA	0.915678	NO	NA	NA
93	15	4	Long	PEST	NOPARA	Uninfected	7.73	14.92	SURVIVED	71	YES	28	0.870617	YES	11	59
94	15	4	Short	PEST	PARA	Infected	7.84	11.17	SURVIVED	71	NO	NA	0.0385663	NO	NA	NA
103	4	1	Short	PEST	PARA	Infected	7.89	12.64	SURVIVED	71	NO	NA	0.0385663	NO	NA	NA
104	3	2	Long	PEST	NOPARA	Uninfected	8.07	20.5	SURVIVED	71	NO	NA	0.523929	NO	NA	NA
105	3	9	Short	NOPEST	PARA	Infected	8.36	8.59	SURVIVED	71	NO	NA	0.211075	NO	NA	NA
108	3	4	Short	PEST	NOPARA	Uninfected	8.12	13.79	SURVIVED	71	NO	NA	0.246579	NO	NA	NA
109	3	4	Short	PEST	PARA	Uninfected	8.1	12.58	DIED	13	NO	NA	0.133615	NO	NA	NA
110	4	1	Short	PEST	NOPARA	Uninfected	7.92	10.86	SURVIVED	71	NO	NA	0.870617	NO	NA	NA
111	9	9	Long	NOPEST	NOPARA	Uninfected	7.83	13.1	SURVIVED	71	NO	NA	0.457686	NO	NA	NA
113	9	9	Short	PEST	NOPARA	Uninfected	7.63	16.95	SURVIVED	71	NO	NA	0.21191	NO	NA	NA
114	9	9	Short	PEST	PARA	Infected	7.72	16.22	SURVIVED	71	NO	NA	0.350585	NO	NA	NA
115	9	9	Short	NOPEST	NOPARA	Uninfected	7.82	12.91	SURVIVED	71	NO	NA	0.0701539	NO	NA	NA
116	1	4	Short	PEST	PARA	Infected	7.66	9.5	DIED	68	YES	13	1.28664	NO	NA	NA
117	1	4	Short	PEST	NOPARA	Uninfected	7.86	5.94	SURVIVED	71	YES	66	0.939955	YES	3	87
118	9	9	Long	NOPEST	PARA	Uninfected	7.51	17.05	SURVIVED	71	YES	21	1.09183	NO	NA	NA
119	9	9	Long	PEST	NOPARA	Uninfected	7.96	12.7	DIED	32	NO	NA	1.1133	NO	NA	NA
120	1	4	Short	NOPEST	PARA	Infected	7.41	11.23	SURVIVED	71	NO	NA	0.492916	NO	NA	NA
121	1	4	Short	NOPEST	NOPARA	Uninfected	8.08	8.6	SURVIVED	71	NO	NA	0.986139	NO	NA	NA
122	9	9	Long	PEST	PARA	Infected	7.32	13.17	SURVIVED	71	YES	39	1.14797	NO	NA	NA
123	1	4	Long	PEST	PARA	Infected	8.14	15.51	DIED	27	YES	21	1.35598	NO	NA	NA
124	1	4	Long	NOPEST	NOPARA	Uninfected	8.14	19.05	SURVIVED	71	YES	33	1.30321	YES	6	81
125	4	10	Short	NOPEST	PARA	Uninfected	8.05	3.99	SURVIVED	71	NO	NA	0.563376	NO	NA	NA
126	4	10	Short	NOPEST	NOPARA	Uninfected	7.87	6.48	SURVIVED	71	NO	NA	0.422456	NO	NA	NA
128	11	6	Short	NOPEST	PARA	Uninfected	7.82	8.06	SURVIVED	71	YES	70	1.02137	NO	NA	NA
129	11	6	Short	NOPEST	NOPARA	Uninfected	7.56	7.11	SURVIVED	71	NO	NA	0.387225	NO	NA	NA
130	11	6	Short	PEST	PARA	Infected	7.11	10.69	DIED	17	NO	NA	0.523929	NO	NA	NA
131	11	6	Short	PEST	NOPARA	Uninfected	7.8	12.27	SURVIVED	71	NO	NA	0.177241	NO	NA	NA
132	4	10	Long	NOPEST	NOPARA	Uninfected	7.55	22.13	SURVIVED	71	NO	NA	0.669067	NO	NA	NA
133	4	10	Long	PEST	PARA	Uninfected	7.93	24.18	DIED	8	NO	NA	NA	NO	NA	NA
134	11	6	Long	NOPEST	PARA	Infected	7.62	14.96	SURVIVED	71	YES	21	1.09183	NO	NA	NA
135	11	6	Long	NOPEST	NOPARA	Uninfected	7.35	20.39	SURVIVED	71	YES	59	0.880448	NO	NA	NA
136	15	5	Short	PEST	NOPARA	Uninfected	7.95	13.73	SURVIVED	71	YES	54	0.697273	NO	NA	NA
137	15	5	Short	NOPEST	PARA	Infected	7.64	12.16	SURVIVED	71	NO	NA	0.0174618	NO	NA	NA
138	11	9	Long	PEST	PARA	Infected	7.5	22.22	DIED	16	NO	NA	1.00929	NO	NA	NA
140	11	5	Long	NOPEST	PARA	Infected	8.08	13.17	SURVIVED	71	YES	70	1.26798	NO	NA	NA
141	11	9	Short	NOPEST	NOPARA	Uninfected	7.58	13.73	SURVIVED	71	YES	44	0.950908	YES	3	82
142	11	9	Short	PEST	NOPARA	Uninfected	7.64	13.41	SURVIVED	71	YES	50	0.974624	YES	2	84
144	11	9	Long	NOPEST	NOPARA	Uninfected	7.71	24.02	SURVIVED	71	YES	55	0.986139	NO	NA	NA
145	11	5	Long	PEST	PARA	Uninfected	7.94	NA	SURVIVED	71	NO	NA	0.939955	NO	NA	NA
146	11	5	Long	PEST	NOPARA	Uninfected	7.43	36.66	DIED	20	NO	NA	1.07863	NO	NA	NA
147	11	5	Short	NOPEST	PARA	Infected	7.61	13.1	SURVIVED	71	NO	NA	0.739527	NO	NA	NA
151	15	3	Short	NOPEST	NOPARA	Uninfected	7.91	10.49	SURVIVED	71	NO	NA	0.633837	NO	NA	NA
152	15	3	Long	PEST	PARA	Uninfected	7.81	16.72	SURVIVED	71	YES	41	0.80128	YES	NA	80
153	15	3	Long	NOPEST	NOPARA	Uninfected	7.92	11.45	SURVIVED	71	NO	NA	0.211075	NO	NA	NA
154	15	3	Long	NOPEST	PARA	Uninfected	7.74	15.65	SURVIVED	71	YES	41	0.739527	YES	2	82
155	15	3	Long	PEST	NOPARA	Uninfected	7.51	17.77	SURVIVED	71	YES	23	0.870617	YES	23	61
156	15	3	Short	PEST	PARA	Uninfected	8.02	11.48	SURVIVED	71	NO	NA	0.177241	NO	NA	NA
157	15	3	Short	PEST	NOPARA	Uninfected	7.55	15.01	SURVIVED	71	NO	NA	0.905286	NO	NA	NA
158	11	6	Short	PEST	PARA	Uninfected	7.67	0	SURVIVED	71	NO	NA	0.246579	NO	NA	NA
159	11	6	Short	NOPEST	NOPARA	Uninfected	7.21	10.82	SURVIVED	71	NO	NA	0.175844	NO	NA	NA
160	3	4	Short	NOPEST	NOPARA	Uninfected	8.31	14.29	DIED	5	NO	NA	0	NO	NA	NA
161	3	4	Long	PEST	PARA	Uninfected	8.19	19.64	SURVIVED	71	YES	70	0.905286	NO	NA	NA
162	3	4	Long	NOPEST	NOPARA	Uninfected	8.14	16.7	SURVIVED	71	YES	14	1.44413	NO	NA	NA
163	9	8	Long	NOPEST	NOPARA	Uninfected	7.22	12.73	SURVIVED	71	YES	31	0.986139	NO	NA	NA
164	9	10	Short	NOPEST	PARA	Uninfected	7.68	10.12	DIED	22	NO	NA	0.140614	NO	NA	NA
165	9	10	Short	PEST	NOPARA	Uninfected	7.87	12	DIED	8	NO	NA	0.151065	NO	NA	NA
166	4	9	Long	PEST	NOPARA	Uninfected	8.02	20.52	SURVIVED	71	YES	40	1.14797	NO	NA	NA
167	4	9	Short	PEST	PARA	Infected	8.12	12.64	SURVIVED	71	NO	NA	0.593267	NO	NA	NA
168	4	9	Short	PEST	NOPARA	Uninfected	7.97	7.65	DIED	8	NO	NA	0.539356	NO	NA	NA
169	4	4	Short	NOPEST	PARA	Infected	7.77	15.45	SURVIVED	71	YES	68	0.739527	YES	1	91
171	4	4	Long	NOPEST	PARA	Infected	8.23	24.08	DIED	10	NO	NA	0.457686	NO	NA	NA
172	9	4	Short	PEST	PARA	Infected	7.54	11.9	SURVIVED	71	NO	NA	0.142573	NO	NA	NA
178	1	6	Long	NOPEST	PARA	Infected	7.82	12.2	DIED	13	NO	NA	0.480968	NO	NA	NA
182	3	5	Long	PEST	NOPARA	Uninfected	7.85	19.81	SURVIVED	71	NO	NA	0.662605	NO	NA	NA
183	3	5	Short	NOPEST	PARA	Uninfected	7.66	11.75	SURVIVED	71	NO	NA	0.140614	NO	NA	NA
184	3	5	Short	PEST	NOPARA	Uninfected	8.17	9.71	SURVIVED	71	NO	NA	0.107904	NO	NA	NA
185	3	5	Long	NOPEST	PARA	Uninfected	7.85	11.56	DIED	11	NO	NA	1.02137	NO	NA	NA
188	12	4	Long	PEST	PARA	Infected	7.55	25.81	SURVIVED	71	YES	27	1.42532	YES	43	52
190	12	4	Long	PEST	NOPARA	Uninfected	8.06	17.01	SURVIVED	71	NO	NA	0.489261	NO	NA	NA
193	9	5	Short	NOPEST	NOPARA	Uninfected	7.8	9.9	SURVIVED	71	NO	NA	0.0879222	NO	NA	NA
194	11	4	Short	NOPEST	PARA	Uninfected	7.55	10.19	SURVIVED	71	NO	NA	0.105384	NO	NA	NA
195	9	5	Short	NOPEST	PARA	Infected	7.87	17.21	SURVIVED	71	NO	NA	0.105384	NO	NA	NA
196	9	5	Short	PEST	NOPARA	Uninfected	7.51	11.53	SURVIVED	71	NO	NA	0.177241	NO	NA	NA
197	9	5	Long	NOPEST	PARA	Uninfected	7.93	12.42	SURVIVED	71	YES	36	0.704297	YES	19	68
198	9	5	Long	PEST	NOPARA	Uninfected	7.98	13.18	SURVIVED	71	YES	15	1.14797	YES	13	52
199	4	2	Long	NOPEST	NOPARA	Uninfected	7.6	20.04	SURVIVED	71	YES	54	0.845218	NO	NA	NA
200	4	2	Long	NOPEST	PARA	Uninfected	8.13	17.95	SURVIVED	71	YES	47	1.09183	NO	NA	NA
201	4	2	Long	PEST	NOPARA	Uninfected	8.07	16.11	SURVIVED	71	YES	70	0.697273	NO	NA	NA
202	4	2	Short	PEST	PARA	Infected	8.12	9.76	SURVIVED	71	NO	NA	0.905286	NO	NA	NA
203	4	2	Short	PEST	NOPARA	Uninfected	7.87	8.59	DIED	17	NO	NA	0.558598	NO	NA	NA
204	4	2	Short	NOPEST	PARA	Infected	7.51	12.96	DIED	9	NO	NA	0	NO	NA	NA
205	4	2	Long	NOPEST	NOPARA	Uninfected	7.61	15.59	DIED	16	NO	NA	0.528146	NO	NA	NA
206	4	2	Short	NOPEST	NOPARA	Uninfected	8.04	17.47	SURVIVED	71	NO	NA	0.633837	NO	NA	NA
207	4	2	Long	PEST	PARA	Uninfected	8.04	21.38	SURVIVED	71	YES	42	1.04396	NO	NA	NA
209	3	9	Short	NOPEST	NOPARA	Uninfected	8.15	16.45	SURVIVED	71	NO	NA	0.880448	NO	NA	NA
210	11	5	Short	PEST	NOPARA	Uninfected	8	15.37	SURVIVED	71	NO	NA	0.350585	NO	NA	NA
211	3	9	Long	PEST	PARA	Infected	8.25	17.04	SURVIVED	71	NO	NA	0.974624	NO	NA	NA
212	3	9	Long	NOPEST	NOPARA	Uninfected	8.35	18.48	SURVIVED	71	YES	70	1.0566	NO	NA	NA
213	11	5	Long	NOPEST	PARA	Infected	8.17	17.46	SURVIVED	71	YES	38	1.16229	NO	NA	NA
214	11	5	Long	NOPEST	NOPARA	Uninfected	7.91	16.36	SURVIVED	71	NO	NA	1.12706	NO	NA	NA
215	11	5	Long	PEST	PARA	Infected	8	16.57	SURVIVED	71	NO	NA	1.07863	NO	NA	NA
216	3	9	Long	NOPEST	PARA	Infected	8.05	17.8	SURVIVED	71	NO	NA	0.351995	NO	NA	NA
217	3	9	Long	PEST	NOPARA	Uninfected	7.94	22.25	SURVIVED	71	NO	NA	1.07863	NO	NA	NA
218	11	5	Long	PEST	NOPARA	Uninfected	8.05	25.03	SURVIVED	71	YES	47	1.04396	YES	1	80
219	3	9	Short	PEST	PARA	Infected	8.13	15.35	SURVIVED	71	NO	NA	0.142573	NO	NA	NA
220	3	9	Short	PEST	NOPARA	Uninfected	7.81	11.24	SURVIVED	71	NO	NA	0.246579	NO	NA	NA
221	12	10	Long	NOPEST	PARA	Uninfected	7.9	17.99	DIED	9	NO	NA	NA	NO	NA	NA
222	12	10	Long	NOPEST	NOPARA	Uninfected	7.8	13.14	SURVIVED	71	YES	53	0.739527	NO	NA	NA
223	12	9	Short	PEST	PARA	Uninfected	8.03	14.03	SURVIVED	71	NO	NA	0.142573	NO	NA	NA
224	1	6	Long	PEST	NOPARA	Uninfected	7.77	24.3	SURVIVED	71	YES	36	0.835948	NO	NA	NA
226	1	6	Short	NOPEST	NOPARA	Uninfected	7.75	9.34	SURVIVED	71	NO	NA	0.105384	NO	NA	NA
227	1	6	Short	PEST	PARA	Infected	7.49	19.43	SURVIVED	71	YES	20	0.870617	YES	12	47
228	11	2	Short	PEST	PARA	Uninfected	7.8	0	SURVIVED	71	NO	NA	0.731942	NO	NA	NA
229	11	2	Short	NOPEST	NOPARA	Uninfected	8.12	14.09	SURVIVED	71	NO	NA	0.193613	NO	NA	NA
231	11	2	Short	PEST	NOPARA	Uninfected	7.78	15.72	SURVIVED	71	YES	15	1.21731	YES	11	77
232	11	2	Long	NOPEST	PARA	Uninfected	7.82	31.21	SURVIVED	71	YES	47	0.986139	NO	NA	NA
233	11	2	Long	NOPEST	NOPARA	Uninfected	7.74	18.14	SURVIVED	71	YES	67	1.0566	NO	NA	NA
234	11	2	Long	PEST	PARA	Uninfected	8	18.81	SURVIVED	71	NO	NA	1.1133	NO	NA	NA
236	1	10	Short	NOPEST	PARA	Infected	7.84	14.53	SURVIVED	71	NO	NA	0.0174618	NO	NA	NA
237	1	10	Short	PEST	NOPARA	Uninfected	7.91	13.69	SURVIVED	71	NO	NA	0.766611	NO	NA	NA
238	11	10	Long	NOPEST	PARA	Infected	7.31	23.45	SURVIVED	71	YES	72	0.950908	NO	NA	NA
239	11	2	Short	NOPEST	PARA	Infected	7.97	20.33	SURVIVED	71	YES	27	0.986139	NO	NA	NA
240	15	5	Short	NOPEST	PARA	Infected	7.95	11.14	SURVIVED	71	NO	NA	0.105384	NO	NA	NA
241	15	5	Short	NOPEST	NOPARA	Uninfected	8.12	10.6	SURVIVED	71	NO	NA	0.175844	NO	NA	NA
242	15	5	Long	PEST	PARA	Infected	7.72	11.49	SURVIVED	71	NO	NA	0.697273	NO	NA	NA
249	12	6	Short	NOPEST	NOPARA	Uninfected	7.43	3.28	SURVIVED	71	YES	9	0.633837	YES	34	56
252	12	7	Short	NOPEST	PARA	Infected	8.06	18.93	SURVIVED	71	NO	NA	0.175844	NO	NA	NA
253	12	7	Short	PEST	NOPARA	Uninfected	7.73	7.49	DIED	5	NO	NA	0	NO	NA	NA
254	12	7	Long	PEST	PARA	Infected	8.07	28.03	SURVIVED	71	YES	53	0.558598	YES	17	78
255	12	7	Long	PEST	NOPARA	Uninfected	7.99	17.61	SURVIVED	71	NO	NA	0.177241	NO	NA	NA
256	12	7	Long	NOPEST	PARA	Uninfected	8.09	17.11	SURVIVED	71	NO	NA	0.175844	NO	NA	NA
265	12	2	Long	NOPEST	NOPARA	Uninfected	7.87	16.09	SURVIVED	71	YES	40	0.915678	YES	17	67
267	12	2	Short	NOPEST	NOPARA	Uninfected	7.77	0	SURVIVED	71	YES	40	1.09183	NO	NA	NA
268	3	7	Short	NOPEST	PARA	Infected	8.38	23.14	SURVIVED	71	YES	68	0.669067	YES	3	94
269	1	7	Long	NOPEST	PARA	Infected	7.16	20.58	SURVIVED	71	NO	NA	0.704297	NO	NA	NA
270	1	7	Short	PEST	PARA	Infected	8.17	12.91	DIED	10	NO	NA	0.662605	NO	NA	NA
274	15	6	Long	NOPEST	NOPARA	Uninfected	8.07	7.27	SURVIVED	71	YES	70	0.739527	NO	NA	NA
279	15	6	Long	PEST	PARA	Uninfected	7.91	9.34	SURVIVED	71	NO	NA	0.385254	NO	NA	NA
280	15	6	Long	PEST	NOPARA	Uninfected	7.93	18.62	SURVIVED	71	YES	46	0.766611	YES	9	78
282	9	7	Long	NOPEST	NOPARA	Uninfected	7.84	22.11	SURVIVED	71	YES	19	0.809988	YES	40	49
286	9	7	Short	NOPEST	NOPARA	Uninfected	7.58	6.65	DIED	8	NO	NA	0.246182	NO	NA	NA
287	9	7	Long	PEST	PARA	Uninfected	7.56	17.66	DIED	45	NO	NA	0.350585	NO	NA	NA
288	9	7	Long	NOPEST	NOPARA	Uninfected	7.77	8.35	SURVIVED	71	YES	22	0.809988	NO	NA	NA
289	9	7	Long	PEST	NOPARA	Uninfected	8.03	16.8	SURVIVED	71	NO	NA	0.315917	NO	NA	NA
290	9	7	Long	NOPEST	PARA	Uninfected	7.91	23.19	SURVIVED	71	YES	33	0.880448	YES	49	55
292	4	6	Short	PEST	PARA	Infected	7.8	9.53	SURVIVED	71	YES	NA	0.80128	YES	7	NA
293	3	3	Long	NOPEST	NOPARA	Uninfected	7.5	11	SURVIVED	71	YES	31	1.09183	NO	NA	NA
295	3	3	Short	PEST	PARA	Uninfected	7.47	26.71	SURVIVED	71	NO	NA	1.04396	NO	NA	NA
296	3	3	Short	NOPEST	NOPARA	Uninfected	7.92	13.88	SURVIVED	71	NO	NA	0.880448	NO	NA	NA
297	3	3	Long	PEST	PARA	Infected	7.92	14.37	SURVIVED	71	YES	11	1.18264	YES	2	41
298	3	3	Long	PEST	NOPARA	Uninfected	7.44	12.27	SURVIVED	71	NO	NA	0.80128	NO	NA	NA
300	4	7	Long	NOPEST	PARA	Infected	8.18	16.84	SURVIVED	71	NO	NA	0.316765	NO	NA	NA
301	4	7	Long	PEST	NOPARA	Uninfected	8.04	15.43	SURVIVED	71	NO	NA	0.523929	NO	NA	NA
302	3	3	Long	PEST	PARA	Infected	7.88	15.33	SURVIVED	71	YES	25	0.697273	YES	3	52
303	3	3	Long	NOPEST	NOPARA	Uninfected	7.61	23.14	SURVIVED	71	YES	35	0.809988	YES	17	67
304	3	3	Short	NOPEST	PARA	Infected	7.94	13.49	SURVIVED	71	YES	47	1.09183	YES	17	75
305	3	3	Short	PEST	NOPARA	Uninfected	7.87	0	DIED	5	NO	NA	0.134982	NO	NA	NA
306	3	3	Long	PEST	NOPARA	Uninfected	8.11	12.73	SURVIVED	71	YES	17	0.905286	YES	3	34
308	3	3	Short	NOPEST	NOPARA	Uninfected	7.98	11.8	DIED	58	NO	NA	1.12706	NO	NA	NA
309	3	3	Short	PEST	PARA	Infected	7.88	19.09	SURVIVED	71	NO	NA	1.00929	NO	NA	NA
310	3	3	Short	PEST	NOPARA	Uninfected	8.07	13.99	SURVIVED	71	NO	NA	1.14797	NO	NA	NA
311	4	7	Long	NOPEST	NOPARA	Uninfected	8.04	22.24	SURVIVED	71	YES	51	1.02137	NO	NA	NA
312	4	7	Long	PEST	PARA	Infected	7.69	23.02	SURVIVED	71	NO	NA	0.107904	NO	NA	NA
314	4	7	Long	PEST	NOPARA	Uninfected	8.27	4.06	SURVIVED	71	YES	34	0.905286	YES	22	59
316	3	3	Long	NOPEST	PARA	Uninfected	8.23	17.12	DIED	60	NO	NA	0.669067	NO	NA	NA
317	3	3	Long	PEST	NOPARA	Uninfected	8.09	17.5	SURVIVED	71	YES	20	1.45999	NO	NA	NA
319	11	7	Short	NOPEST	PARA	Uninfected	8	15.24	SURVIVED	71	NO	NA	0.0879222	NO	NA	NA
320	11	7	Long	PEST	PARA	Infected	7.83	20.81	SURVIVED	71	YES	70	1.07863	NO	NA	NA
321	11	7	Long	NOPEST	PARA	Infected	7.57	22.59	SURVIVED	71	YES	71	0.739527	NO	NA	NA
323	12	9	Long	NOPEST	NOPARA	Uninfected	7.98	16.15	SURVIVED	71	NO	NA	0.334533	NO	NA	NA
324	11	7	Long	NOPEST	NOPARA	Uninfected	8.2	20.58	SURVIVED	71	YES	63	1.0566	YES	NA	92
325	11	7	Long	PEST	PARA	Infected	8	19.4	DIED	69	NO	NA	1.14797	YES	NA	NA
327	9	3	Long	NOPEST	NOPARA	Uninfected	8.3	14.07	SURVIVED	71	NO	NA	0.052692	NO	NA	NA
330	9	2	Short	PEST	PARA	Infected	7.44	8.03	SURVIVED	71	YES	23	1.04396	YES	2	63
332	1	7	Long	NOPEST	PARA	Infected	7.7	11.92	SURVIVED	71	YES	38	1.32131	YES	16	63
333	1	7	Long	NOPEST	NOPARA	Uninfected	7.71	13.06	DIED	5	NO	NA	0.880448	NO	NA	NA
334	11	4	Long	PEST	NOPARA	Uninfected	7.21	13.52	SURVIVED	71	YES	17	0.974624	YES	8	56
336	9	2	Short	NOPEST	NOPARA	Uninfected	6.65	11.7	DIED	4	NO	NA	NA	NO	NA	NA
341	11	4	Short	NOPEST	NOPARA	Uninfected	7.72	17.86	SURVIVED	71	YES	28	1.09183	YES	4	64
342	11	4	Long	NOPEST	PARA	Infected	7.38	17.23	SURVIVED	71	YES	70	0.669067	NO	NA	NA
